# Supplementary material for: Effectors of the Stenotrophomonas maltophilia Type IV Secretion System Mediate Killing of Clinical Isolates of Pseudomonas aeruginosa
Source: PubMed Central journal article supplement (PMC8262851; doi:10.1128/mbio.01502-21), 2021-06-29
Supplement: mbio.01502-21-st001.pdf [file mbio.01502-21-st001.pdf]

Table S1

A

| Strain       |               | Percent Identity to Putative T4SS Effector Proteins of <i>S. maltophilia</i> strain K279a |         |         |         |         |         |         |         |         |         |         |         |         |    |
|--------------|---------------|-------------------------------------------------------------------------------------------|---------|---------|---------|---------|---------|---------|---------|---------|---------|---------|---------|---------|----|
| Name         | Source        | RS00510                                                                                   | RS00905 | RS01275 | RS01575 | RS02375 | RS02385 | RS02400 | RS14245 | RS14255 | RS14405 | RS17170 | RS19100 | RS20845 |    |
| K279a        | environmental | 100                                                                                       | 100     | 100     | 100     | 100     | 100     | 100     | 100     | 100     | 100     | 100     | 100     | 100     |    |
| FDAARGOS_325 | clinical      | 98                                                                                        | 99      | 100     | 100     | 100     | 50      | 96      | 95      | 92      | 95      | 93      | 95      | 100     | 95 |
| CSM2         | environmental | 92                                                                                        | 91      | 68      | 43      | 50      | 97      | 83      | 90      | 90      | 84      | 81      | 79      | 30      |    |
| FDAARGOS_92  | clinical      | 98                                                                                        | 98      | 99      | 47      | 49      | 97      | 59      | 100     | 99      | 93      | 75      | 39      | 99      |    |
| SJTH1        | environmental | 92                                                                                        | 99      | 97      | 81      | 97      | 97      | 92      | 92      | 97      | 49      | 82      | 39      | 28      |    |
| FDAARGOS_507 | clinical      | 99                                                                                        | 98      | 99      | 43      | 50      | 96      | 95      | 100     | 100     | 99      | 100     | 35      | 97      |    |
| X28          | environmental | 96                                                                                        | 96      | 98      | 44      | 97      | 97      | 90      | 93      | 95      | 49      | 100     | 35      | 40      |    |
| FDAARGOS_649 | clinical      | 98                                                                                        | 99      | 100     | 47      | 50      | 97      | 58      | 100     | 99      | 93      | 100     | 35      | 98      |    |
| Sm53         | environmental | 98                                                                                        | 99      | 99      | 39      | 49      | 96      | 58      | 100     | 99      | 93      | 100     | 100     | 98      |    |
| ICU331       | environmental | 100                                                                                       | 100     | 100     | 100     | 50      | 96      | 59      | 100     | 100     | 94      | 100     | 35      | 99      |    |
| NEB515       | environmental | 98                                                                                        | 98      | 100     | 42      | 49      | 96      | 93      | 100     | 99      | 98      | 100     | 35      | 98      |    |
| CF13         | clinical      | 98                                                                                        | 97      | 99      | 44      | 50      | 97      | 92      | 100     | 100     | 99      | 100     | 35      | 97      |    |
| NCTC10258    | clinical      | 99                                                                                        | 100     | 99      | 39      | 49      | 96      | 94      | 100     | 100     | 99      | 100     | 100     | 98      |    |
| NCTC10498    | clinical      | 99                                                                                        | 98      | 100     | 39      | 49      | 97      | 58      | 100     | 99      | 93      | 100     | 99      | 100     |    |
| R551-3       | clinical      | 91                                                                                        | 96      |         | 44      | 43      | 96      | 91      | 91      | 92      | 46      | 100     | 39      | 92      |    |
| JV3          | environmental | 91                                                                                        | 91      |         | 44      | 51      | 96      | 86      | 90      | 90      | 93      | 96      | 96      | 30      |    |
| OUC_Est10    | environmental | 92                                                                                        | 95      | 98      | 82      | 97      | 96      | 93      | 92      | 93      | 49      | 80      | 39      |         |    |
| W18          | environmental | 96                                                                                        | 96      | 98      | 45      | 50      | 98      | 94      | 91      | 96      | 93      | 100     | 39      | 31      |    |
| KMM_349      | environmental | 90                                                                                        | 95      |         | 42      | 50      | 96      | 91      | 91      | 90      | 93      | 81      | 78      | 90      |    |
| sm454        | environmental |                                                                                           | 99      | 100     | 39      | 49      | 100     | 100     | 100     | 99      | 100     | 100     | 100     | 99      |    |
| sm-RA9       | unknown       | 90                                                                                        | 95      |         | 42      | 50      | 97      | 92      | 91      | 92      | 93      | 81      | 78      | 91      |    |
| PEG-42       | environmental |                                                                                           | 96      | 98      | 45      | 50      | 98      | 84      | 91      | 90      | 93      | 100     | 35      | 30      |    |
| NCTC10498    | clinical      | 100                                                                                       | 99      | 99      | 40      | 50      | 96      | 67      | 100     | 99      | 93      |         | 39      | 99      |    |
| NCTC10257    | clinical      | 99                                                                                        | 99      | 99      | 47      | 49      | 97      | 94      | 99      | 98      | 98      | 100     | 34      |         |    |
| NCTC13014    | environmental |                                                                                           | 96      | 98      | 44      | 51      | 97      | 96      | 93      | 89      | 93      | 100     | 35      | 30      |    |
| D457         | unknown       | 90                                                                                        | 92      |         | 45      | 50      | 96      | 96      | 90      | 90      | 83      | 81      | 36      |         |    |
| AB550        | environmental | 91                                                                                        | 92      |         | 83      | 98      | 95      | 92      | 90      | 91      | 83      | 80      | 36      |         |    |
| PEG-68       | environmental | 90                                                                                        | 92      |         | 45      | 48      | 96      | 95      | 90      | 90      | 86      | 81      | 35      |         |    |
| PEG-390      | environmental |                                                                                           | 95      |         | 46      | 68      | 97      | 95      | 88      | 89      | 56      | 81      | 37      | 49      |    |
| PEG-173      | environmental | 90                                                                                        | 96      |         | 43      | 50      | 96      | 91      | 93      | 95      | 86      |         | 36      | 28      |    |
| CPBW01       | environmental |                                                                                           | 96      |         | 45      | 72      | 98      | 94      | 97      | 94      | 57      | 82      | 39      | 30      |    |
| MER1         | environmental |                                                                                           | 72      |         | 80      | 84      | 87      | 64      | 74      | 80      | 74      | 68      | 36      | 88      |    |
| NCTC10259    | environmental | 91                                                                                        | 92      |         | 80      | 97      | 94      | 95      | 95      | 90      | 85      | 66      | 39      |         |    |
| SMMS2        | clinical      |                                                                                           | 96      |         | 44      | 98      | 96      | 90      | 92      | 89      | 49      | 82      | 39      |         |    |
| SMMS2R       | clinical      |                                                                                           | 96      |         | 44      | 98      | 96      | 90      | 92      | 88      | 49      | 82      | 35      |         |    |
| SKK55        | environmental |                                                                                           | 35      |         | 40      | 72      | 96      | 97      | 90      | 90      | 58      | 82      | 79      |         |    |
| PEG-305      | environmental |                                                                                           | 38      |         | 43      | 50      | 95      | 86      | 90      | 89      | 92      | 73      | 78      |         |    |
| PEG-141      | environmental |                                                                                           | 96      |         | 82      | 50      | 96      | 91      | 92      | 89      | 92      | 81      | 35      |         |    |
| J5           | environmental |                                                                                           | 73      |         | 48      | 49      | 87      | 73      | 74      | 80      | 72      | 79      |         |         |    |
| AA1*         | environmental |                                                                                           |         |         |         |         |         |         |         |         |         |         |         |         |    |
| SJTL3*       | environmental |                                                                                           |         |         |         |         |         |         |         |         |         |         |         |         |    |
| SMMS3*       | clinical      |                                                                                           |         |         |         |         |         |         |         |         |         |         |         |         |    |
| AVERAGE      |               | 63                                                                                        | 92      | 54      | 53      | 62      | 96      | 86      | 93      | 93      | 80      | 80      | 52      | 49      |    |

\* Strains lacking *virB/D4* T4SS apparatus genes

B

| Strain       |               | Percent Identity to Putative Cognate Immunity Proteins of <i>S. maltophilia</i> strain K279a |         |         |         |         |         |         |         |         |         |         |         |         |
|--------------|---------------|----------------------------------------------------------------------------------------------|---------|---------|---------|---------|---------|---------|---------|---------|---------|---------|---------|---------|
| Name         | Source        | RS00515                                                                                      | RS00910 | RS01280 | RS01580 | RS02380 | RS02390 | RS02405 | RS14240 | RS14260 | RS14410 | RS17165 | RS19095 | RS20840 |
| K279a        | clinical      | 100                                                                                          | 100     | 100     | 100     | 100     | 100     | 100     | 100     | 100     | 100     | 43      | 100     | 100     |
| FDAARGOS_325 | clinical      | 99                                                                                           | 100     | 99      | 100     | 43      | 98      | 96      | 78      | 100     | 80      | 100     | 99      | 100     |
| Sm53         | environmental | 99                                                                                           | 99      | 99      |         | 42      | 98      | 97      | 100     | 99      | 80      | 95      | 99      | 99      |
| sm454        | environmental | 98                                                                                           | 100     | 98      |         | 41      | 98      | 99      | 100     | 100     | 99      | 100     | 99      | 100     |
| ICU331       | environmental | 100                                                                                          | 100     | 100     | 100     | 42      | 98      | 97      | 100     | 100     | 80      | 100     |         | 99      |
| NCTC10258    | clinical      | 100                                                                                          | 100     | 99      |         | 41      | 98      | 99      | 100     | 100     | 99      | 100     | 100     | 98      |
| NCTC10498    | clinical      | 97                                                                                           | 100     | 99      |         | 42      | 98      | 100     | 100     | 100     | 80      | 98      | 100     | 100     |
| D457         | unknown       | 83                                                                                           | 93      |         | 75      | 45      | 97      | 89      | 78      | 80      | 84      | 44      | 57      |         |
| OUC_Est10    | environmental | 86                                                                                           | 95      | 94      | 75      | 96      | 98      | 90      | 78      | 79      | 78      | 45      |         |         |
| SJTH1        | environmental | 85                                                                                           | 95      | 95      | 76      | 96      | 98      | 93      | 78      | 98      | 94      |         |         | 44      |
| FDAARGOS_507 | clinical      | 98                                                                                           | 99      |         |         | 97      | 98      | 96      | 100     | 100     | 99      | 98      |         | 99      |
| FDAARGOS_649 | clinical      | 98                                                                                           | 100     | 98      |         | 42      | 98      | 97      | 100     | 100     | 80      | 100     |         | 100     |
| KMM_349      | environmental | 86                                                                                           | 95      |         |         | 46      | 97      | 93      | 77      | 79      | 94      | 42      | 58      | 93      |
| sm-RA9       | unknown       | 86                                                                                           | 95      |         |         | 46      | 97      | 94      | 77      | 79      | 95      | 43      | 58      | 95      |
| NEB515       | environmental | 97                                                                                           | 100     | 99      |         | 40      | 98      | 97      | 100     | 100     | 98      | 100     |         | 100     |
| CF13         | clinical      | 99                                                                                           | 99      | 100     |         | 42      | 97      | 99      | 100     | 100     | 99      | 100     |         | 100     |
| NCTC10257    | clinical      | 100                                                                                          | 100     | 99      |         | 41      | 98      | 98      | 100     | 100     | 99      | 97      |         | 100     |
| R551-3       | environmental | 79                                                                                           | 94      |         |         | 46      | 97      | 94      | 77      | 98      | 95      | 100     |         | 94      |
| JV3          | environmental | 85                                                                                           | 93      |         |         | 44      | 98      | 91      | 87      | 80      | 94      | 91      | 96      |         |
| CSM2         | environmental | 85                                                                                           | 91      |         |         | 45      | 98      | 91      | 87      | 97      | 84      | 45      | 58      |         |
| FDAARGOS_92  | clinical      | 97                                                                                           | 99      | 98      |         | 43      | 97      | 97      | 100     | 99      | 80      |         |         | 99      |
| X28          | environmental | 71                                                                                           | 97      | 98      |         | 97      | 98      | 77      | 81      | 98      | 41      | 95      |         |         |
| PEG-68       | environmental | 83                                                                                           | 93      |         |         | 94      | 98      | 89      | 78      | 80      | 79      | 44      | 58      |         |
| PEG-42       | environmental | 96                                                                                           | 96      | 94      |         | 43      | 98      | 96      | 78      | 79      | 97      | 90      |         | 40      |
| NCTC10498    | clinical      | 99                                                                                           | 100     | 99      |         | 42      | 98      | 97      | 100     | 100     | 80      |         |         | 100     |
| NCTC13014    | environmental |                                                                                              | 96      | 94      |         | 42      | 98      | 95      | 88      | 79      | 97      | 99      |         | 40      |
| AB550        | environmental | 83                                                                                           | 93      |         | 73      | 97      | 98      | 91      | 78      | 80      | 84      |         |         |         |
| W18          | environmental |                                                                                              | 95      | 94      |         | 42      | 97      | 95      | 79      | 93      | 96      | 90      |         |         |
| J5           | environmental |                                                                                              | 60      |         | 72      | 41      | 92      | 82      | 67      | 96      | 81      |         | 63      |         |
| PEG-173      | environmental | 85                                                                                           | 96      |         |         | 44      | 99      | 78      | 88      | 99      | 78      |         |         | 43      |
| PEG-141      | environmental |                                                                                              | 96      |         | 79      | 45      | 99      | 78      | 80      | 79      | 97      | 42      |         |         |
| MER1         | environmental |                                                                                              | 57      |         | 71      | 82      | 93      | 85      | 67      | 96      | 76      |         |         | 92      |
| NCTC10259    | environmental | 83                                                                                           | 93      |         | 74      | 97      | 97      | 90      | 96      | 80      | 84      |         |         |         |
| SMMS2        | clinical      | 95                                                                                           |         |         |         | 96      | 98      | 78      | 79      | 41      | 45      |         |         |         |
| SMMS2R       | clinical      | 95                                                                                           |         |         |         | 96      | 98      | 78      | 79      | 41      | 45      |         |         |         |
| PEG-305      | environmental |                                                                                              |         |         |         | 42      | 96      | 92      | 86      | 80      | 98      |         | 56      |         |
| CPBW01       | environmental |                                                                                              | 95      |         |         | 98      | 98      | 78      | 98      | 96      |         | 44      |         | 40      |
| SKK55        | environmental |                                                                                              |         |         |         | 98      | 98      | 89      | 86      | 79      | 44      |         | 56      |         |
| PEG-390      | environmental |                                                                                              | 96      |         |         | 99      | 99      | 89      | 86      | 80      | 45      |         |         |         |
| AA1*         | environmental |                                                                                              |         |         |         | 52      | 84      |         |         |         | 32      |         |         |         |
| SJTL3*       | environmental |                                                                                              |         |         |         |         | 96      | 79      |         |         |         | 97      |         |         |
| SMMS3*       | clinical      |                                                                                              |         |         |         |         | 96      | 79      |         |         |         |         |         |         |
| AVERAGE      |               | 63                                                                                           | 79      | 47      | 21      | 52      | 97      | 89      | 81      | 84      | 74      | 55      | 28      | 47      |

\* Strains lacking *virB/D4* T4SS apparatus genes
