# Supplementary material for: Effectors of the Stenotrophomonas maltophilia Type IV Secretion System Mediate Killing of Clinical Isolates of Pseudomonas aeruginosa
Source: PubMed Central journal article supplement (PMC8262851; doi:10.1128/mbio.01502-21), 2021-06-29
Supplement: mbio.01502-21-st002.pdf [file mbio.01502-21-st002.pdf]

Table S2. Primers used in this study

| Primer Name | 5' to 3' Sequence                                                                              | Gene    |
|-------------|------------------------------------------------------------------------------------------------|---------|
| MN34        | CGCAGTGCAGAAGAGATTGA                                                                           | RS20845 |
| MN35        | CAGCATGAACGTACCGAAGT                                                                           | RS20845 |
| MN36        | GATCAGGACCTCGCATGTT                                                                            | RS19100 |
| MN37        | CGACTGATCTACGGGTGATTG                                                                          | RS19100 |
| MN38        | CAGACCTGGCACTGAATCTT                                                                           | RS14405 |
| MN39        | CAGCAGTTGGGATCGAGTT                                                                            | RS14405 |
| MN40        | AAACCTGGCTGAGTTGATGT                                                                           | RS14255 |
| MN41        | CGGCACGCTCGTAATTCT                                                                             | RS14255 |
| MN42        | GAACCCGGCCAAGAAGAAA                                                                            | RS14245 |
| MN43        | TGATAGACGGTGCCCTGATA                                                                           | RS14245 |
| MN44        | TGGAGCAATCGATGCAGAAG                                                                           | RS02400 |
| MN45        | CGCAGGATGCTGCATTTT                                                                             | RS02400 |
| MN46        | AAATCACCGAGGAGCACTAC                                                                           | RS02385 |
| MN47        | CCAGACGAAATCACTGCAAC                                                                           | RS02385 |
| MN48        | ATTCGTGTCTGTCTCCTA                                                                             | RS02375 |
| MN49        | CAGCAGTCCATAGCCATCATT                                                                          | RS02375 |
| MN50        | TCAGATCGCTGAGGTGTTAAG                                                                          | RS01575 |
| MN51        | CGTAGAAGTCGCCGTAGTAAAG                                                                         | RS01575 |
| MN52        | GCAGAAGGTGCTGGAAGAA                                                                            | RS01275 |
| MN53        | TCCTTGTTGTTGGCGTAGG                                                                            | RS01275 |
| MN54        | ATCGGTTCCGATGCCAAA                                                                             | RS00905 |
| MN55        | CGCGTACTTGTGGATGTAGTAG                                                                         | RS00905 |
| MN56        | GAATCGCTGGATCGCTACAT                                                                           | RS00510 |
| MN57        | ATCCAGCATCGGCTTGAC                                                                             | RS00510 |
| MN58        | AAAAAAAAGCTTACTACTACGGTCGTGGCGTCTG                                                             | RS14245 |
| MN59        | AAAAAATCTAGATCAGGCCTGCAGGCTGCGGGTC                                                             | RS14245 |
| MN60        | AAAAAAAAGCTTTTCAGCGTGATCACCAACGGC                                                              | RS14255 |
| MN61        | AAAAAATCTAGACTACAGGGATCGAGAACGCTGC                                                             | RS14255 |
| MN62        | AAAAAGCTTGAACCTGCAATGGAATGCCCATG                                                               | RS14410 |
| MN63        | AAATCTAGACACTTGGACCGGGTGC GCGCATG                                                              | RS14410 |
| MN64        | AAAAAGCTTTGCTCGCAATGGATTGGACGTGTG                                                              | RS01280 |
| MN65        | AAATCTAGATCAGTCCAGCAGCTGCAGATACTTC                                                             | RS01280 |
| MN66        | AAAAAGCTTGAACCTCCTTGGAGCTTCGCCATG                                                              | RS02405 |
| MN67        | AAATCTAGATCAGTCTGCCGCGCATGATCATAG                                                              | RS02405 |
| MN68        | AAAAAGCTTGTGCCATTCAAGGACGCTCGCATG                                                              | RS02390 |
| MN69        | AAATCTAGAGTGCCATTCAAGGACGCTCGCATG                                                              | RS02390 |
| MN70        | AAAAAGCTTCATTGGCGCGGAGATGCTTTCATG                                                              | RS01580 |
| MN71        | AAATCTAGATCAGTCTGACGGATCGATATGTAG                                                              | RS01580 |
| MN72        | AAAAAAGATCTGTGACCATCACCTCTCAGGACT                                                              | RS14245 |
| MN73        | AAAAAAGGTACCTCAGGCCTGCAGGCTGCGGGTC                                                             | RS14245 |
| MN74        | AAAAAAGATCTGTGTCGACCGATAGAGAGTCGC                                                              | RS14255 |
| MN75        | AAAAAAGGTACCCTACAGGGATCGAGAACGCTGC                                                             | RS14255 |
| MN76        | AAAAAAGAATTC <b>ATGAAATACCTGCTGCCGACCGCT</b><br><b>GCTGCTGGTCTGCTGCTCCTCGCTGCCAGCCGGCGAT</b>   | RS14245 |
|             | <b>GGCCACCATCACCTCTCAGGACTACG</b>                                                              |         |
|             | AAAAAAGAATTC <b>ATGAAATACCTGCTGCCGACCGCTG</b><br><b>CTGCTGGTCTGCTGCTCCTCGCTGCCAGCCGGCGATGG</b> | RS14255 |
| MN77        | <b>CCACCATCACCTCTCAGGACTACG</b>                                                                |         |
| M13F        | GTAAAACGACGGCCAG                                                                               |         |
| M13 R       | CAGGAAACAGCTATGAC                                                                              |         |

\*PelB sequence in bold
